# Supplementary material for: Self-assembly between dicarboxylate ions and binuclear europium complexes: moving to water—pH dependence and effects of buffers
Source: Royal Society of Chemistry journal article supplement (doi:10.1039/c2dt32009f), 2012-10-10
Supplement: c2dt32009f.pdf [file c2dt32009f.pdf]

Supporting information for

## Self-assembly between dicarboxylate ions and binuclear europium complexes: moving to water—pH dependence and effects of buffers

Leila R. Hill,<sup>a</sup> Thomas Just Sørensen,<sup>\*a,b</sup> Octavia A. Blackburn,<sup>a</sup> Asha Brown,<sup>a</sup> Paul D. Beer<sup>a</sup> and  
Stephen Faulkner<sup>\*a</sup>

### Contents

|    |                                           |    |
|----|-------------------------------------------|----|
| 10 | Contents                                  | 1  |
|    | Molecular structures and synthesis        | 2  |
|    | Titration curves, Spectra and Fitting     | 4  |
|    | Time-resolved emission intensity profiles | 14 |
| 15 | DynaFit script example                    | 20 |

## Molecular structures and Synthesis

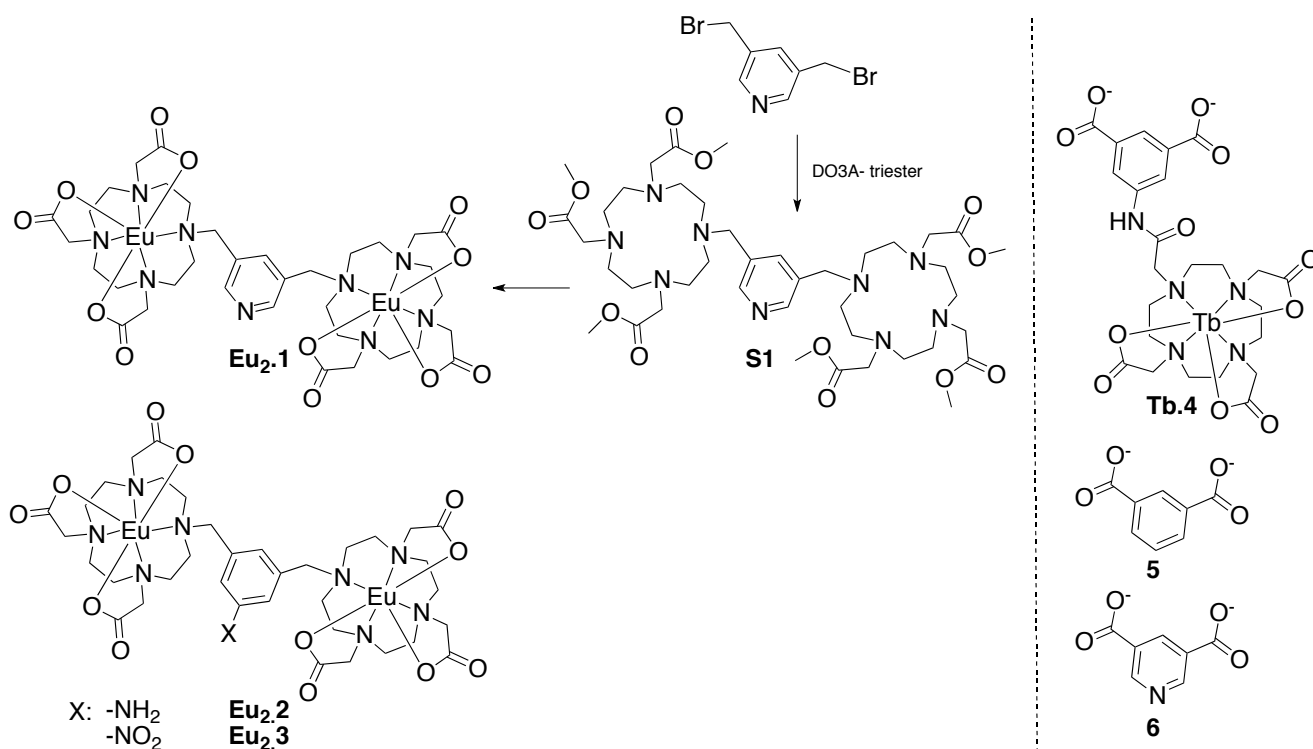

### 5 $\alpha, \alpha'$ -bis(DO3A)-3,5-dimethylpyridine *tert*-butyl hexa ester (**S1**)

1,4,7-Tris(*tert*-butoxycarbonylmethyl)-1,4,7,10-tetraazacyclododecane (0.234 g, 0.455 mmol) and 3,5-bis(chloromethyl)pyridine<sup>1</sup> (0.040 g, 0.227 mmol) were dissolved in dry CH<sub>3</sub>CN (10 mL) and Cs<sub>2</sub>CO<sub>3</sub> (0.163 g, 0.500 mmol) was added. The mixture was heated at reflux under an atmosphere of N<sub>2</sub> for 60 hours, before being cooled to room temperature and filtered. After concentration of the filtrate on a rotary evaporator, the oily brown residue was dissolved in CH<sub>2</sub>Cl<sub>2</sub> (25 mL) and the solution was washed with sat. NaCl<sub>(aq)</sub> (3 x 20 mL), dried over MgSO<sub>4</sub> and concentrated on a rotary evaporator. Purification of the residue by column chromatography (CH<sub>2</sub>Cl<sub>2</sub>:MeOH 98:2 graded to 85:15) afforded the title compound as a glassy yellow solid (0.102 g, 40%). Mp = 119–121 °C;  $\delta_{\text{H}}$ (500 MHz, DMSO-*d*<sub>6</sub>, 398 K): 1.43 (s, 36 H, <sup>1</sup>Bu-CH<sub>3</sub>); 1.45 (s, 18 H, <sup>1</sup>Bu-CH<sub>3</sub>), 2.66–2.69 (m, 8 H, NCH<sub>2</sub>), 2.78–2.81 (m, 24 H, NCH<sub>2</sub>), 3.17 (s, 8 H, NCH<sub>2</sub>CO<sub>2</sub>C(CH<sub>3</sub>)<sub>3</sub>), 3.25 (s, 4 H, NCH<sub>2</sub>CO<sub>2</sub>(CH<sub>3</sub>)<sub>3</sub>), 3.64 (s, 4 H, NCH<sub>2</sub>Ar), 7.67 (t, <sup>4</sup>*J* = 1.5 Hz, 1 H, py-ArH), 8.44 (d, <sup>4</sup>*J* = 1.5 Hz, 2 H, py-ArH);  $\delta_{\text{C}}$ (75 MHz, DMSO-*d*<sub>6</sub>, 293 K): 27.6, 27.7 (CCH<sub>3</sub>), 49.1 (br), 54.3, 55.6, 55.8 (NCH<sub>2</sub>), 81.6, 81.8 (CCH<sub>3</sub>), 130.1, 140.5, 150.1 (Ar), 172.8 (CO); ESMS: *m/z* 577.9 {M + Na + H}<sup>2+</sup>, 588.9 {M + 2Na}<sup>2+</sup>, 1132.8 {M + H}<sup>+</sup>, 1154.8 {M + Na}<sup>+</sup>; HRMS (ES): *m/z* 588.8821 ({M + 2Na}<sup>2+</sup>). 0.5C<sub>59</sub>H<sub>105</sub>N<sub>9</sub>NaO<sub>12</sub> requires 588.8834.

### $\alpha, \alpha'$ -bis(DO3A)-3,5-dimethylpyridine hexaacid (**H<sub>6</sub>.1**)

The hexaester **3** (0.090 g, 0.079 mmol) was dissolved in CH<sub>2</sub>Cl<sub>2</sub> (5 mL) and trifluoroacetic acid (5 mL) was added dropwise. The solution was stirred at room temperature under an atmosphere of N<sub>2</sub> for 48 hours, before removal of the solvents on a rotary evaporator. The residue was dissolved in MeOH (1 mL) and Et<sub>2</sub>O (20 mL) was added. The resulting precipitate was collected by filtration, washed with Et<sub>2</sub>O (4 x 5 mL) and dried under vacuum to give **H<sub>6</sub>.1** as a trifluoroacetic acid adduct (yellow solid, 0.090 g). Mp = 210–214 °C;  $\delta_{\text{H}}$ (500 MHz, DMSO-*d*<sub>6</sub>, 393 K): 2.88–2.90 (m, 8 H, NCH<sub>2</sub>), 2.98–3.02 (m, 16 H, NCH<sub>2</sub>), 3.07–3.09 (m, 8 H, NCH<sub>2</sub>), 3.47 (s, 8 H, NCH<sub>2</sub>CO<sub>2</sub>H), 3.54 (s, 4 H, NCH<sub>2</sub>CO<sub>2</sub>H), 3.99 (s, 4 H, NCH<sub>2</sub>Ar), 8.03 (t, <sup>4</sup>*J* = 1.9 Hz, 1 H, py-ArH), 8.54 (d, <sup>4</sup>*J* = 1.9 Hz, 2 H, py-ArH);  $\delta_{\text{C}}$ (126 MHz, DMSO-*d*<sub>6</sub>, 293 K): 48.7, 49.7, 50.4, 54.3 (br, NCH<sub>2</sub>), 117.3 (q, <sup>1</sup>*J* = 301 Hz, CF<sub>3</sub>CO<sub>2</sub>H), 130.9, 140.8, 150.4 (br, Ar), 158.1 (CF<sub>3</sub>CO<sub>2</sub>H), 170.1, 171.5 (br, CO);  $\delta_{\text{F}}$ (282 MHz, DMSO-*d*<sub>6</sub>): -74 (s); MALDI-TOF MS: *m/z* 796.6 {M}<sup>+</sup>.

**Eu<sub>2</sub>-( $\alpha$ ,  $\alpha'$ -bis(DO3A)-3,5-dimethylpyridine) (Eu<sub>2</sub>.1)**

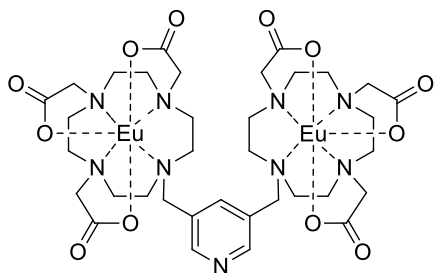

Pyridine-3,5-bisDO3A hexaacid (20 mg, 0.016 mmol) was dissolved in MeOH (2mL) and the pH adjusted to 5 (with dilute NaOH or HCl), if required. Europium triflate (19.14 mg, 0.032 mg) was added and the pH adjusted to 5, if required. This was left for 15 minutes and the pH adjusted to 5 again, if required. The ligand is more soluble at lower pH and the solution becomes a suspension at higher pH values, for example pH 7. The solution was heated at reflux under nitrogen for 48 hours. The reaction mixture was cooled to room temperature and the solvent removed under reduced pressure. Water was added to dissolve the suspended solid and 0.1 M NaOH added until the pH reached a value of 10. The mixture was centrifuged for 6 minutes and then filtered through an acrodisc. The basic solution was then concentrated under reduced pressure. Yield:

$\delta_{\text{H}}$ /ppm (300 MHz, D<sub>2</sub>O) = 30.67, 23.87, 12.92, 12.28, 10.92, 8.83, 7.65, 7.58, 3.65, 2.34, 1.90, -3.98, -5.98, -8.69, -9.88, -11.86, -12.22, -13.03, -15.12, -16.49, -17.76

MALDITOF+ ( $m/z$ ) predicted: 1092.2, 1094.2, 1096.2, 1097.2 ( $[M + H]^+$ ); measured: 1092.5, 1093.5, 1095.5, 1096.5, 1097.5 ( $[M + H]^+$ ), 1116 ( $[M + Na]^+$ ).

**References:**

1. M.-C. Lagunas, R. A. Gossage, W. J. J. Smeets, A. L. Spek and G. van Koten, *Eur. J. Inorg. Chem.*, 1998, **1998**, 163-168.



### Titration curves, Spectra and Fitting

Eu<sub>2</sub>:1:6 – TRIS pH = 9

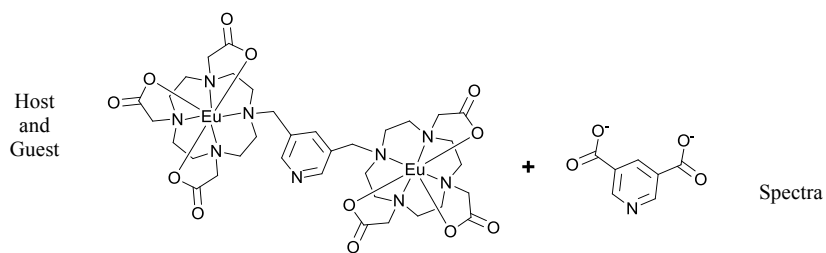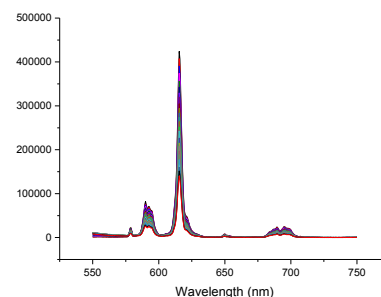

Solvent: TRIS buffer pH = 9  
 Quenching?: Yes  
 Stern-Volmer Linear?: No

Binding curve  
 Intensity

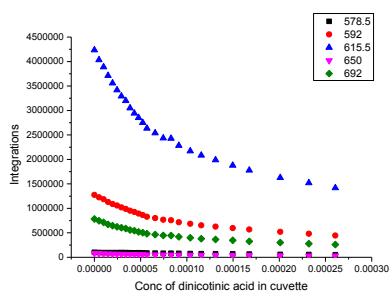

Binding curve  
 $I(\Delta J=2)/I(\Delta J=X)$

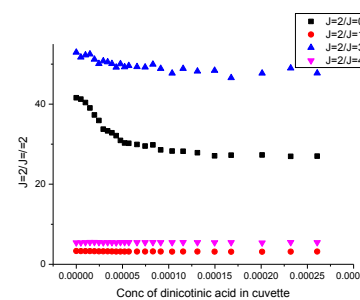

Binding curve  
 Fit

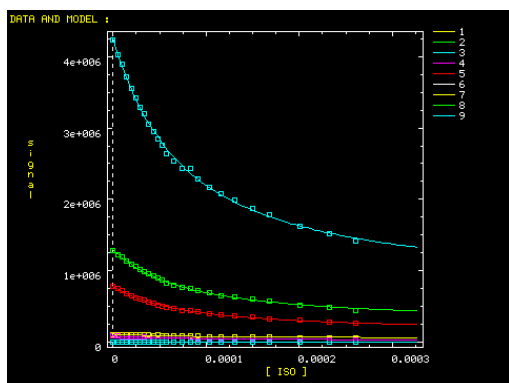

Confidence  
 interval of K

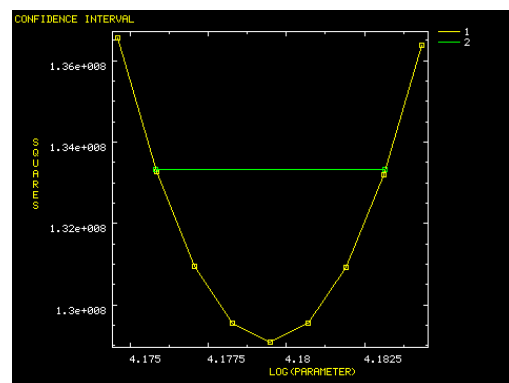

**Eu<sub>2</sub>:2:6 – TRIS pH = 9**

Host and Guest

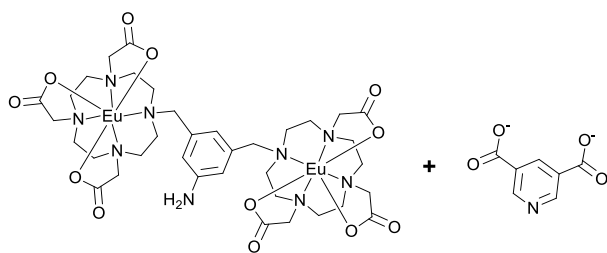

Spectra

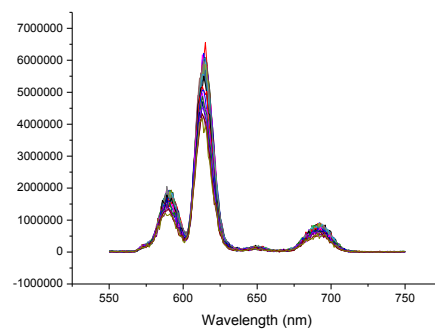

Solvent

TRIS buffer pH = 9

Quenching?

Yes

Stern-Volmer  
Linear?

Yes, for the decrease in intensity following the flat start

Binding curve  
Intensity

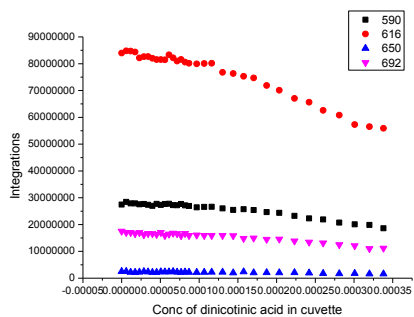

Binding curve  
 $I(\Delta J=2)/I(\Delta J=X)$

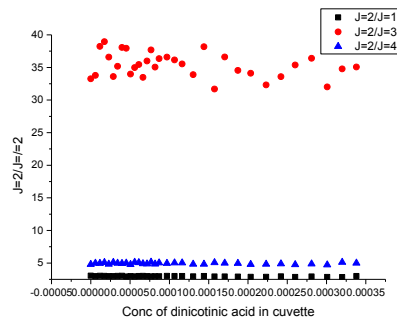

Binding curve  
Fit

-

Confidence  
interval of K

-

**Eu<sub>2</sub>.3:6 – TRIS pH = 9**

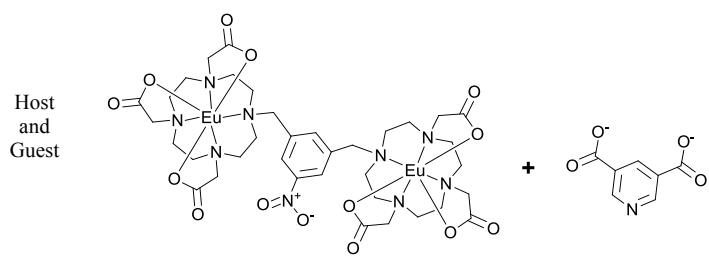

TRIS buffer pH = 9

Spectra

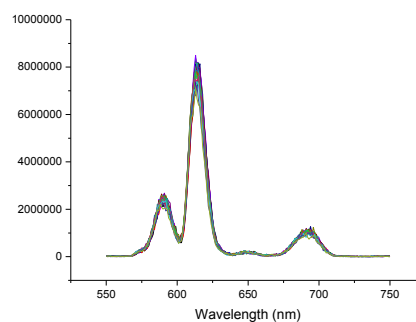

Solvent

Quenching?

Yes

Stern-Volmer Linear?

Yes, for the decrease in intensity

Binding curve Intensity

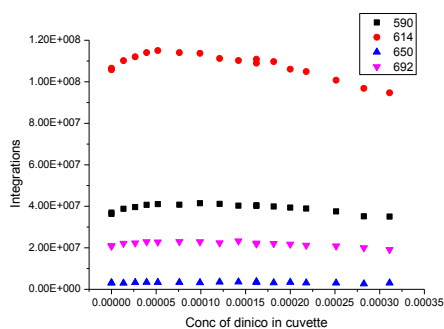

Binding curve  $I(\Delta J=2)/I(\Delta J=X)$

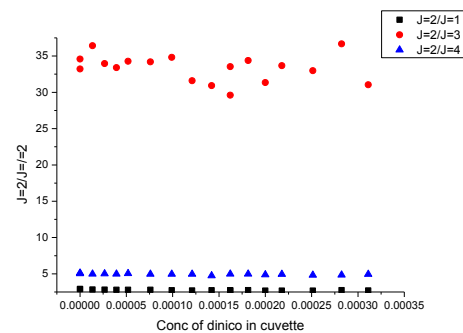

Binding curve Fit

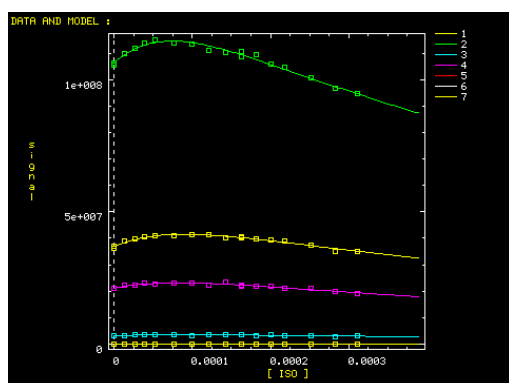

Confidence interval of K

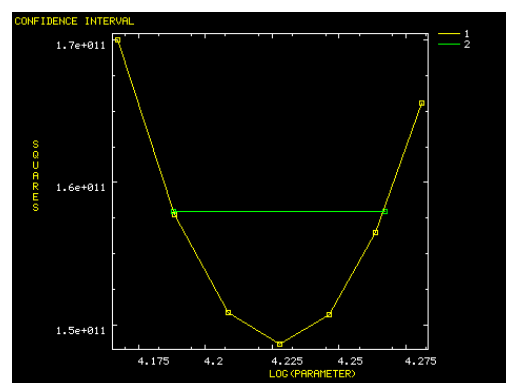

**Eu<sub>2</sub>:1:6 – TRIS pH = 7**

Host and Guest

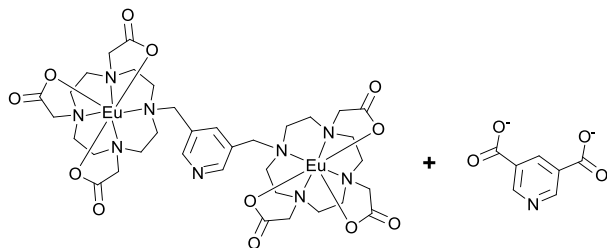

Spectra

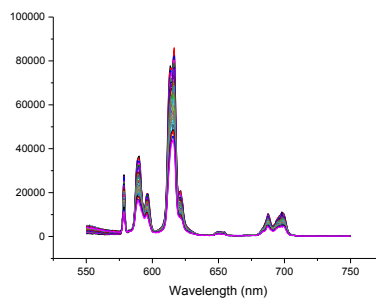

Solvent

TRIS buffer pH = 7

Quenching?

Yes

Stern-Volmer  
Linear?

No

Binding curve  
Intensity

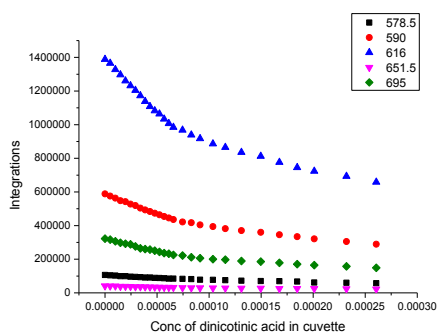

Binding curve  
 $I(\Delta J=2)/I(\Delta J=X)$

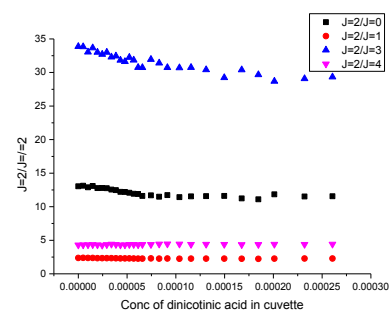

Binding curve  
Fit

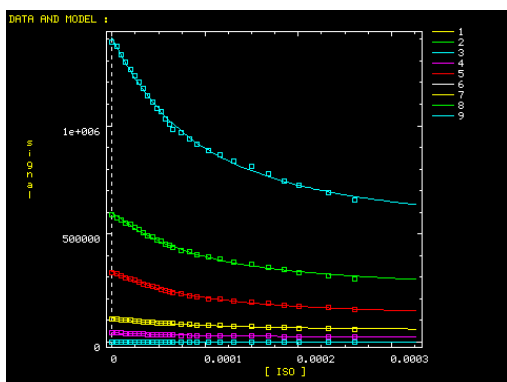

Confidence  
interval of K

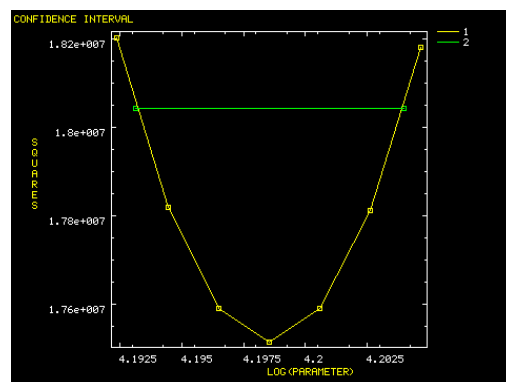



**Eu<sub>2</sub>:1:6 – TRIS pH = 8**

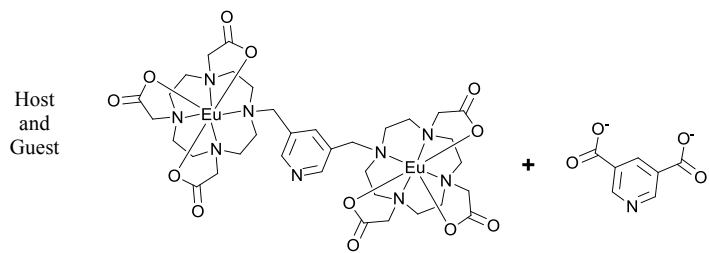

Spectra

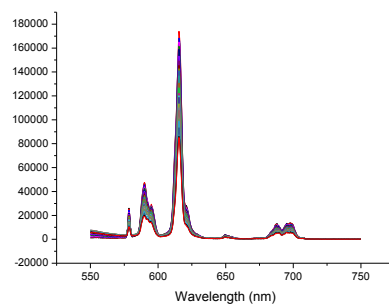

Solvent

TRIS buffer pH = 8

Quenching?

Yes

Stern-Volmer  
Linear?

No

Binding curve  
Intensity

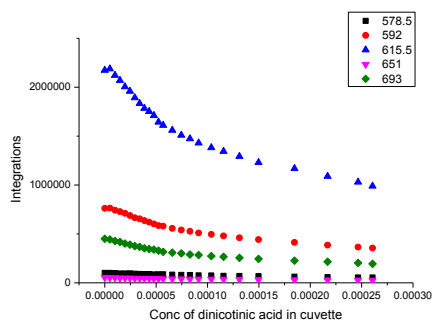

Binding curve  
 $I(\Delta J=2)/I(\Delta J=X)$

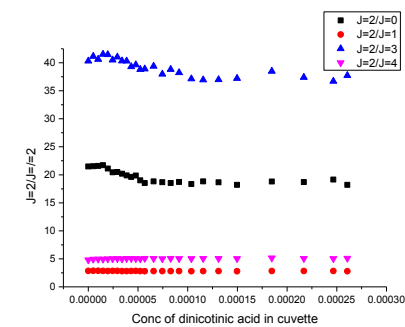

Binding curve  
Fit

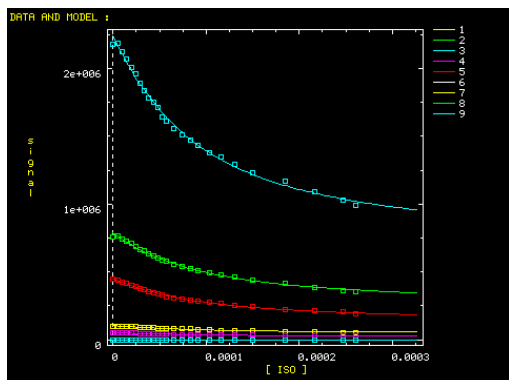

Confidence  
interval of K

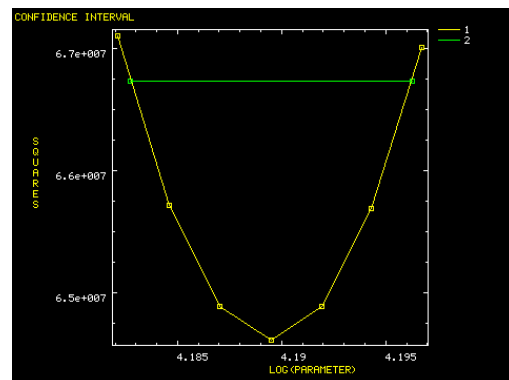

**Eu<sub>2</sub>:1:6 – TRIS pH = 10.5**

Host and Guest

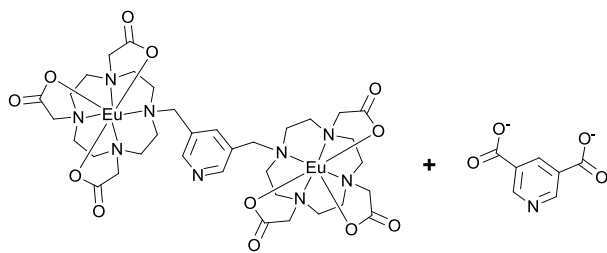

Spectra

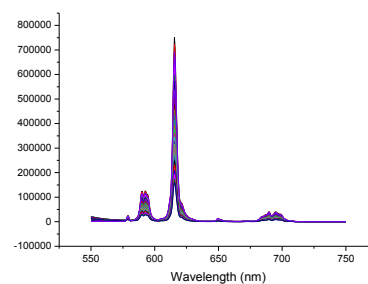

Solvent

TRIS buffer pH = 10.5

Quenching?

Yes

Stern-Volmer  
Linear?

No

Binding curve  
Intensity

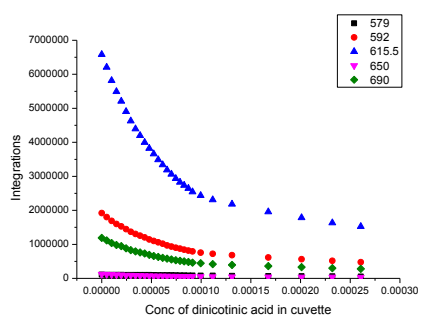

Binding curve  
 $I(\Delta J=2)/I(\Delta J=X)$

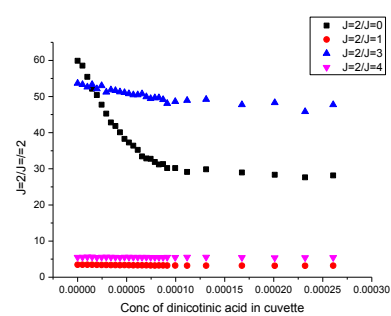

Binding curve  
Fit

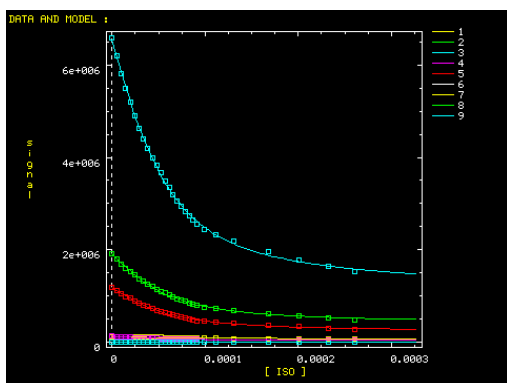

Confidence  
interval of K

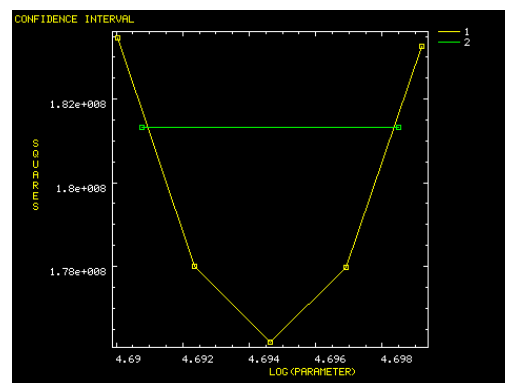

**Eu<sub>2</sub>:1:6 – PBS pH = 7**

Host and Guest

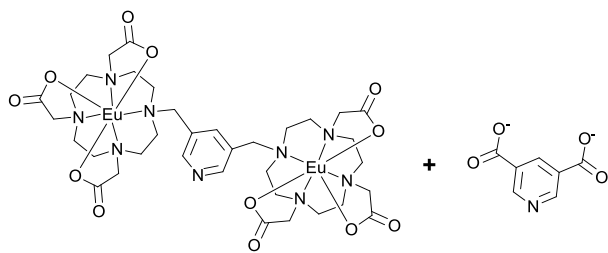

Spectra

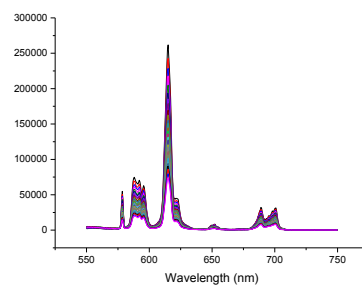

Solvent

PBS buffer pH = 7

Quenching?

Yes

Stern-Volmer Linear?

No

Binding curve Intensity

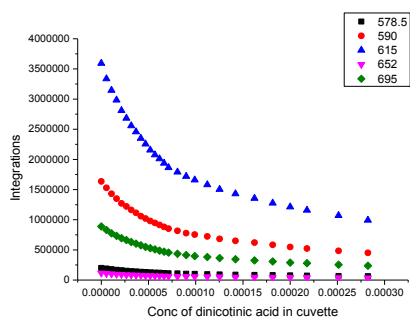

Binding curve  $I(\Delta J=2)/I(\Delta J=X)$

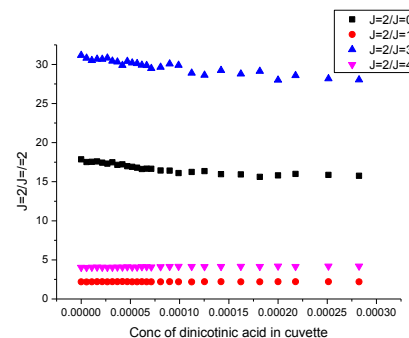

Binding curve Fit

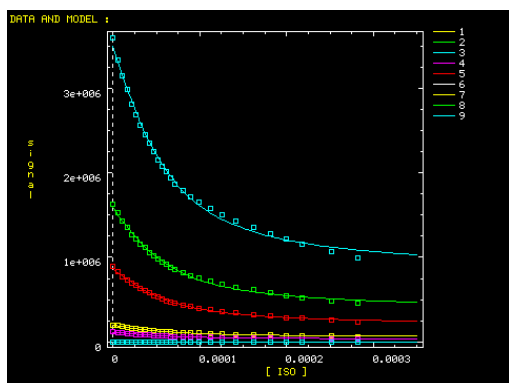

Confidence interval of K

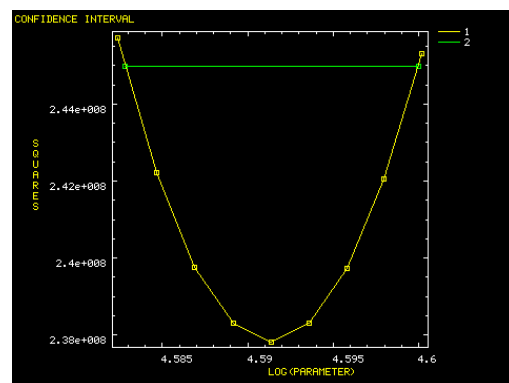

**Eu<sub>2</sub>:1:6 – PBS pH = 8**

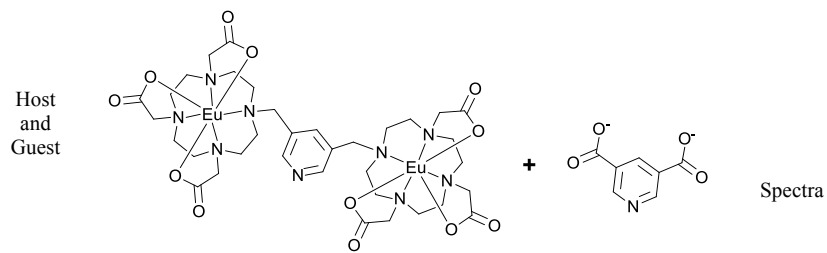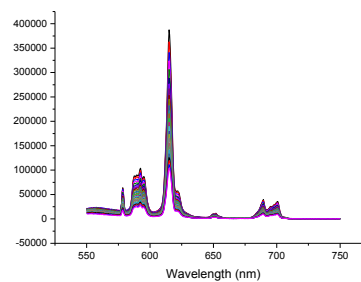

Solvent: PBS buffer pH = 8

Quenching? Yes

Stern-Volmer Linear? No

Binding curve  
Intensity

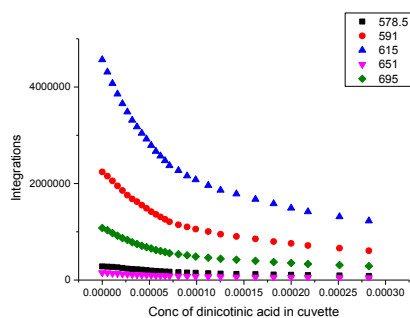

Binding curve  
 $I(\Delta J=2)/I(\Delta J=X)$

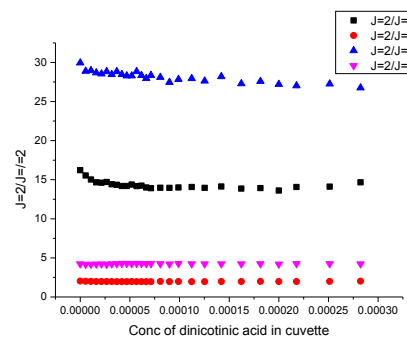

Binding curve  
Fit

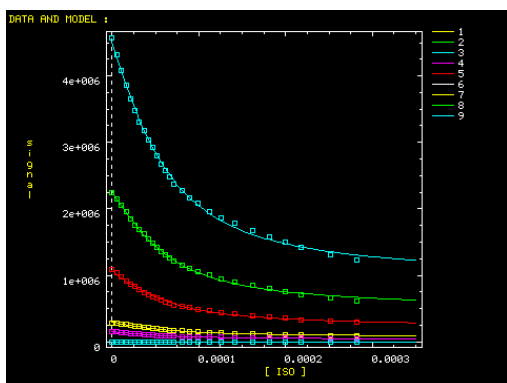

Confidence  
interval of K

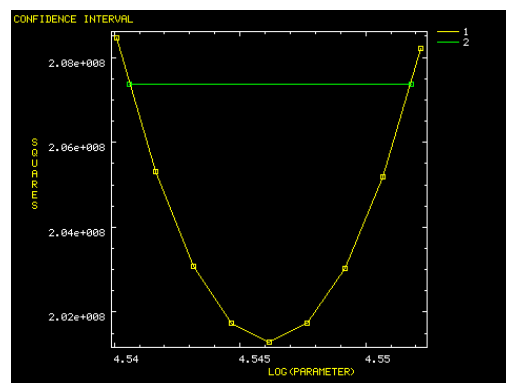

**Eu<sub>2</sub>:1:6 – PBS pH = 9**

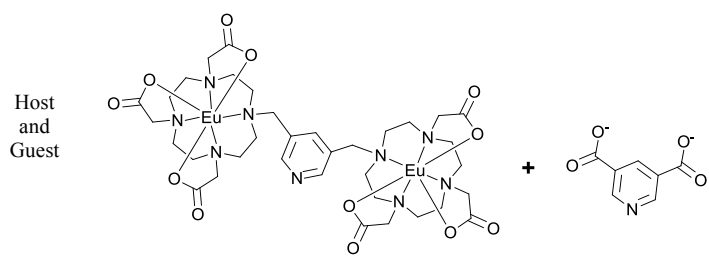

Spectra

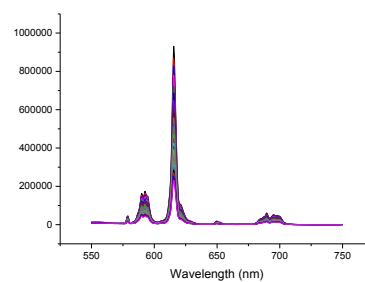

Solvent

PBS buffer pH = 9

Quenching?

Yes

Stern-Volmer Linear?

No

Binding curve  
Intensity

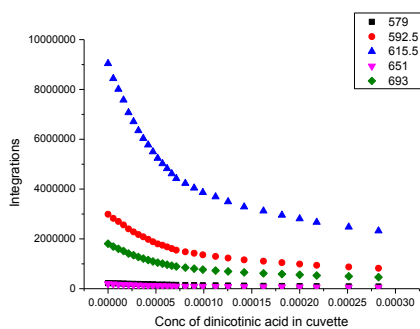

Binding curve  
 $I(\Delta J=2)/I(\Delta J=X)$

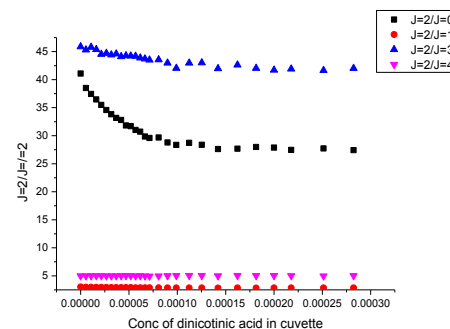

Binding curve  
Fit

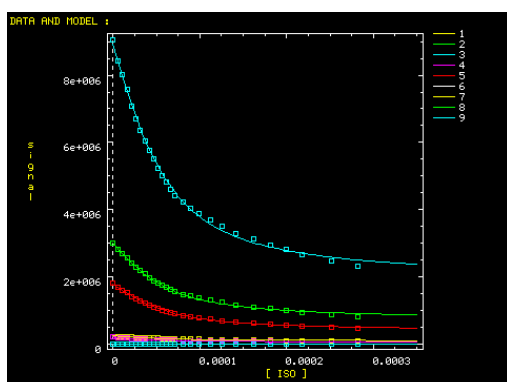

Confidence interval of K

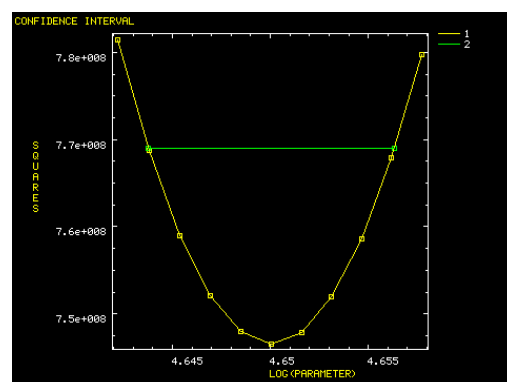

**Eu<sub>2</sub>.1:6 – HEPES pH = 7**

Host and Guest

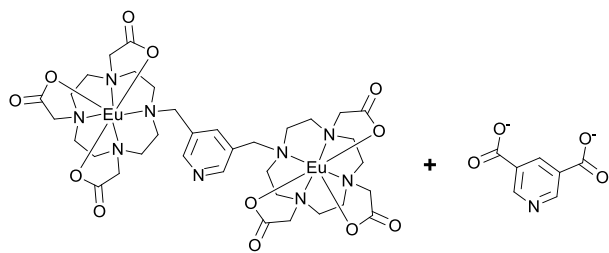

Spectra

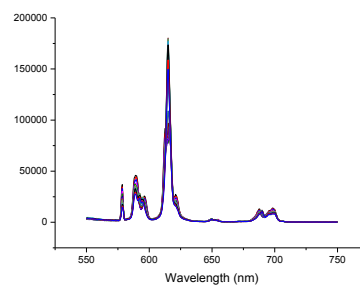

Solvent

HEPES buffer pH = 7

Quenching?

Yes

Stern-Volmer Linear?

No

Binding curve  
Intensity

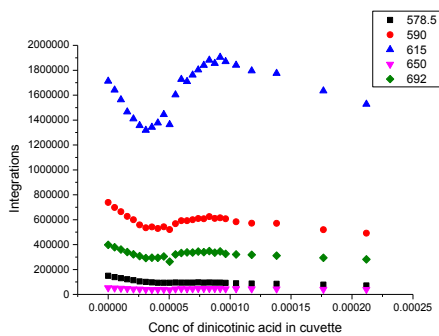

Binding curve  
 $I(\Delta J=2)/I(\Delta J=X)$

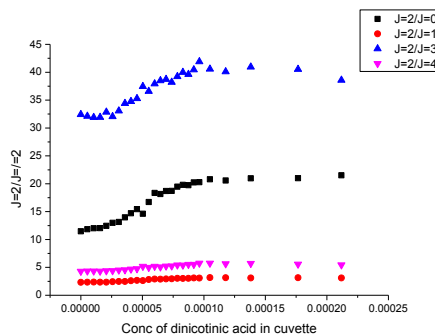

Binding curve  
Fit

Could not fit

Confidence  
interval of K

Could not fit

**Eu<sub>2</sub>:1:6- HEPES pH = 8**

Host and Guest



Spectra

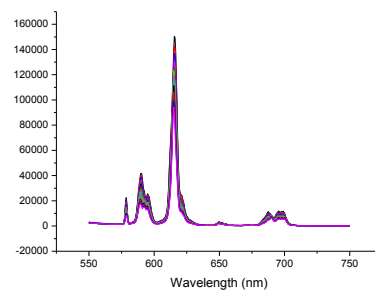

Solvent

HEPES buffer pH = 8

Quenching?

Yes

Stern-Volmer Linear?

Yes, at >3 equivalents

Binding curve Intensity

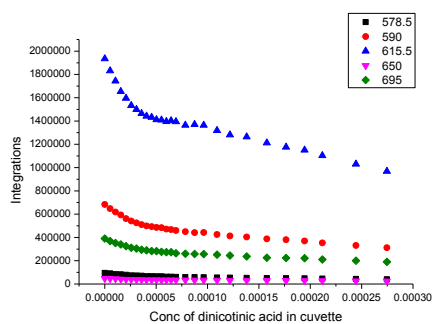

Binding curve  $I(\Delta J=2)/I(\Delta J=X)$

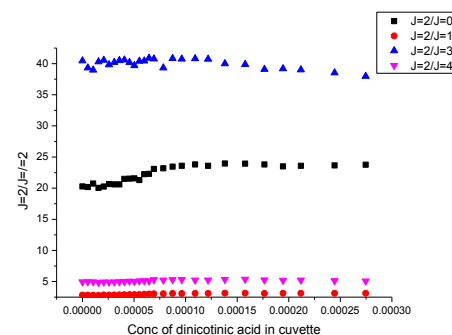

Binding curve Fit

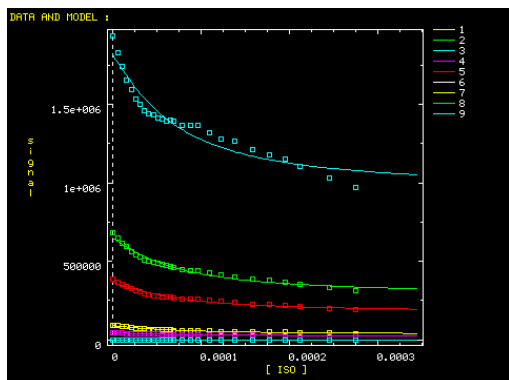

Confidence interval of K

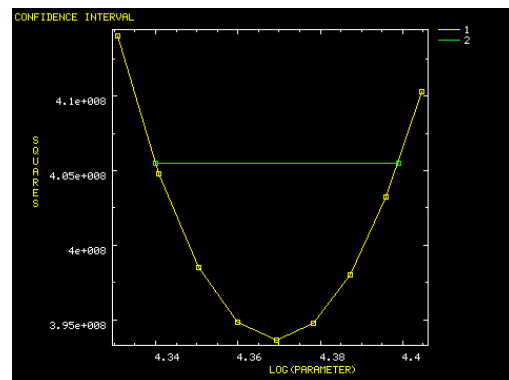

**Eu<sub>2</sub>:1:6 – HEPES pH = 9**

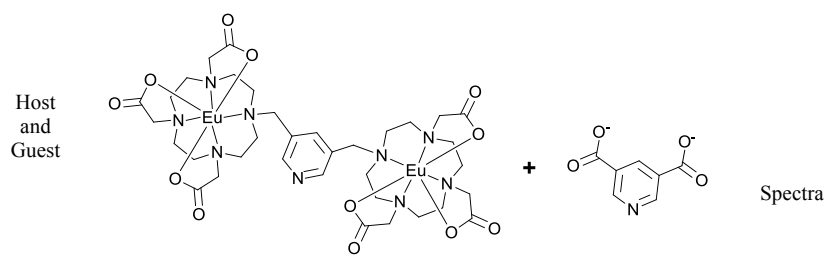

Solvent HEPES buffer pH = 9

Quenching? Yes

Stern-Volmer Linear? Yes, at >3 equivalents

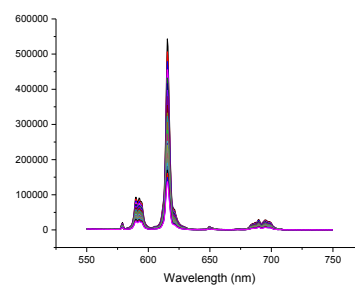

Binding curve  
Intensity

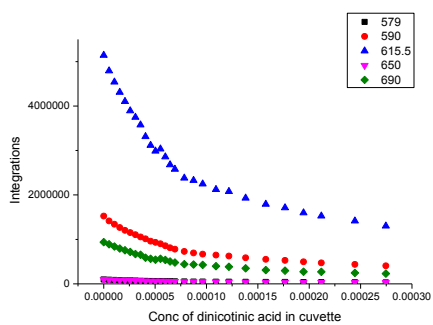

Binding curve  
 $I(\Delta J=2)/I(\Delta J=X)$

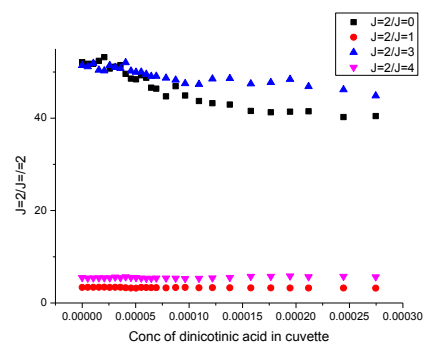

Binding curve  
Fit

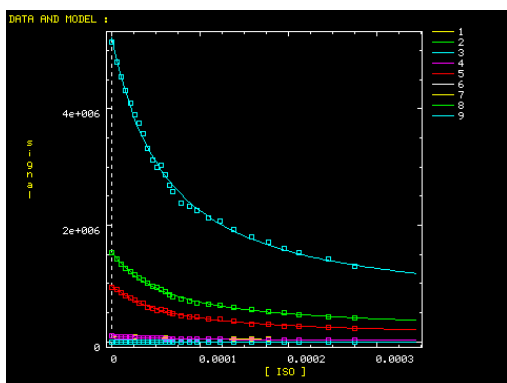

Confidence  
interval of K

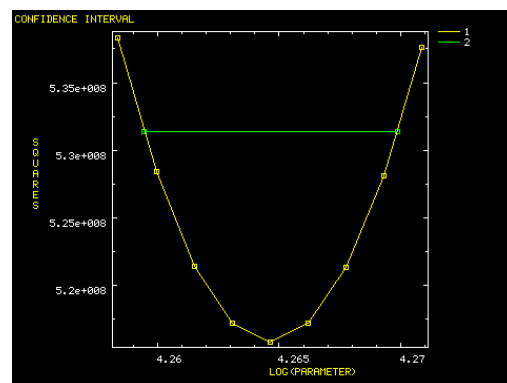



### Time-resolved emission intensity profiles

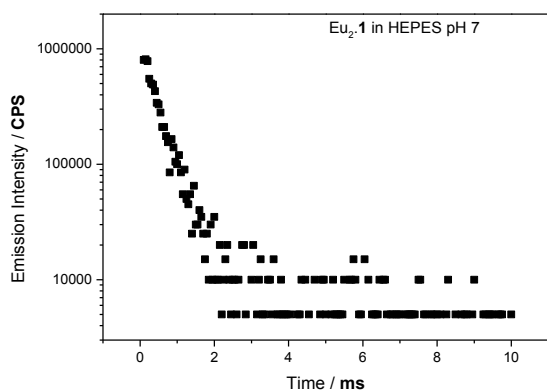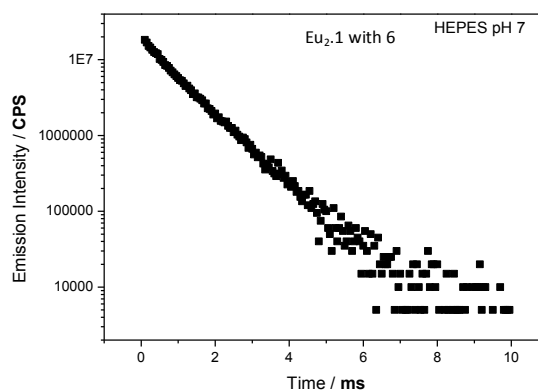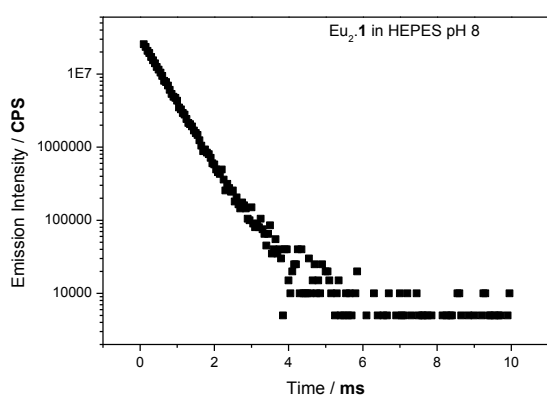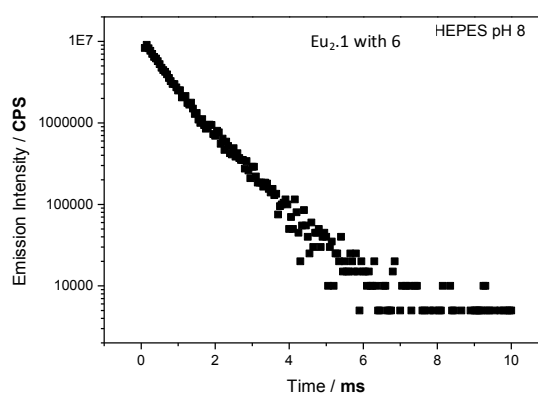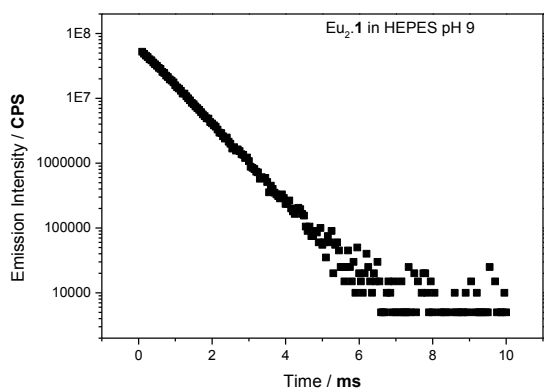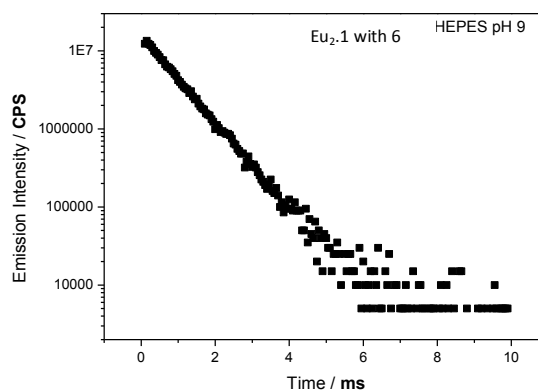

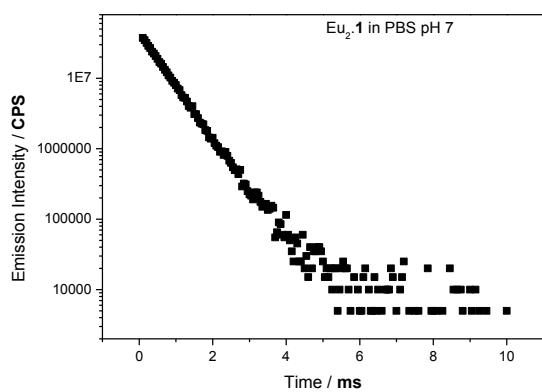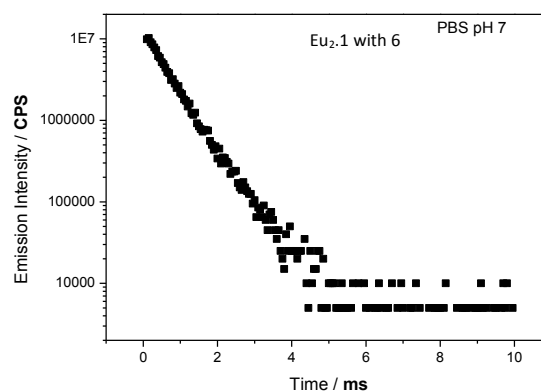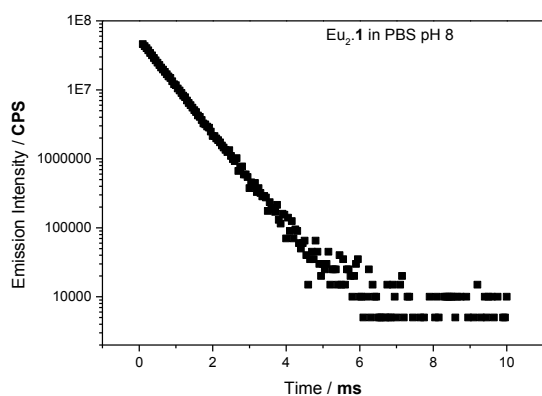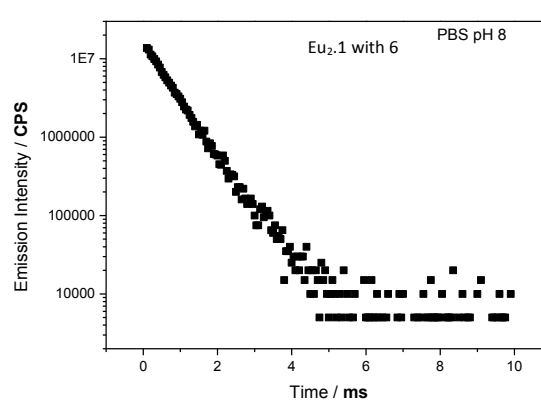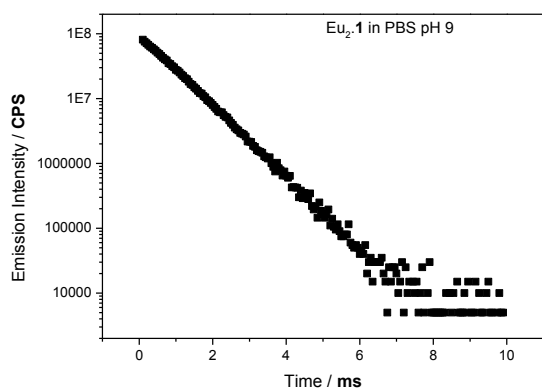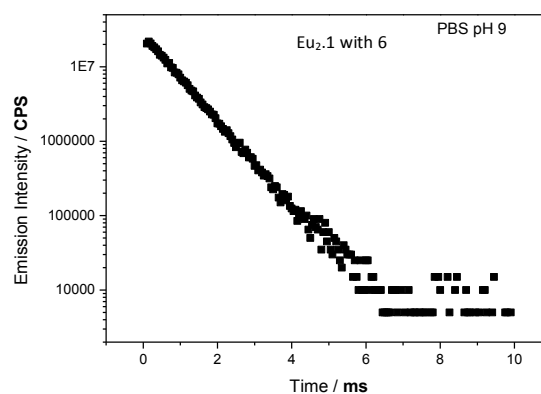

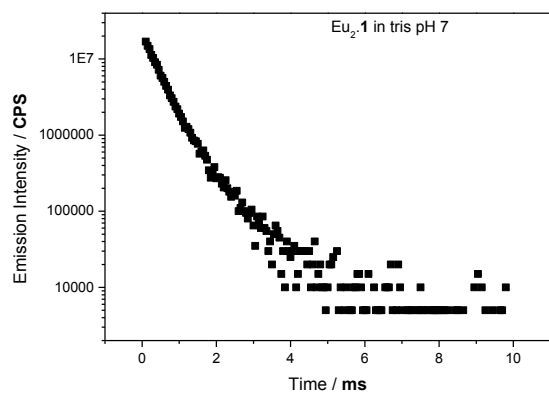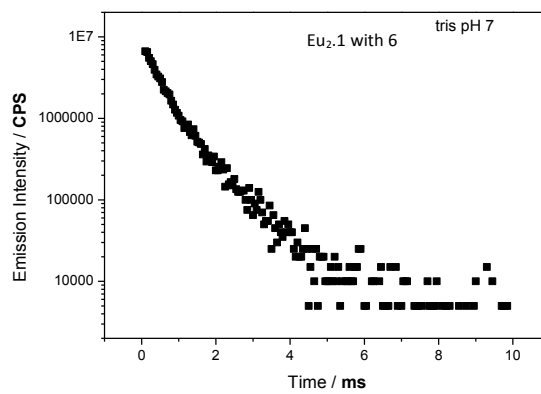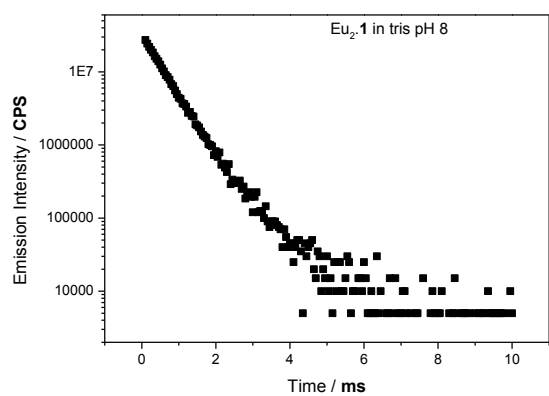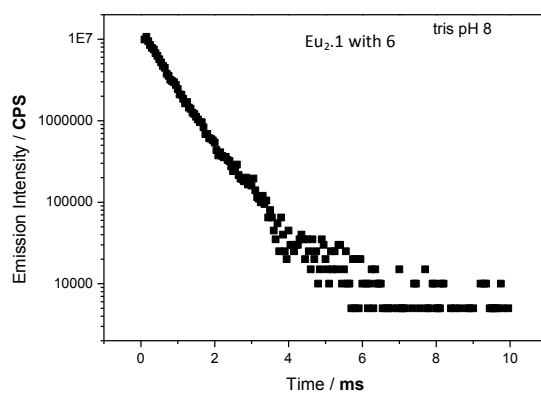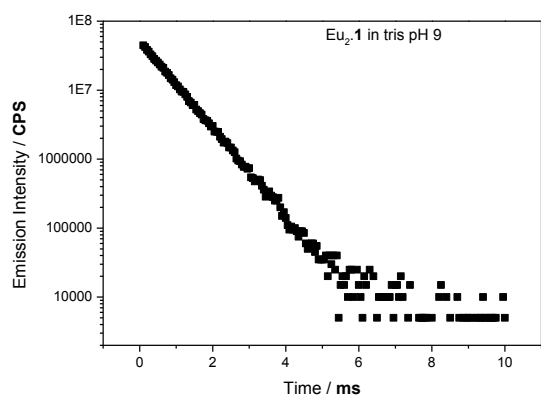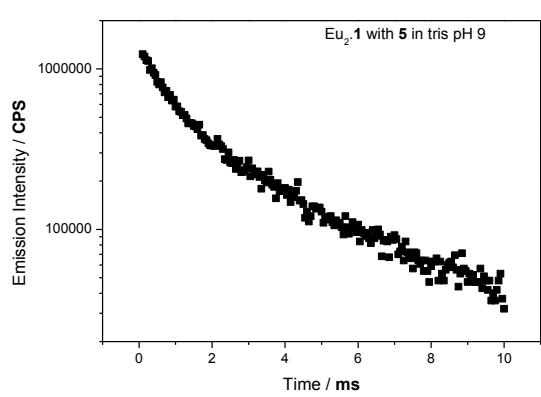

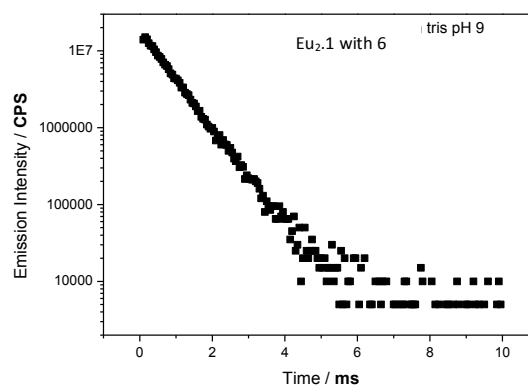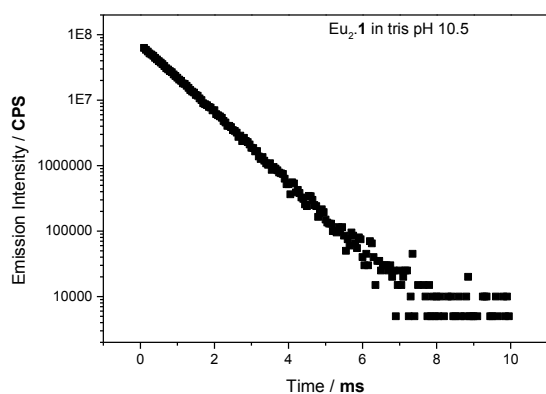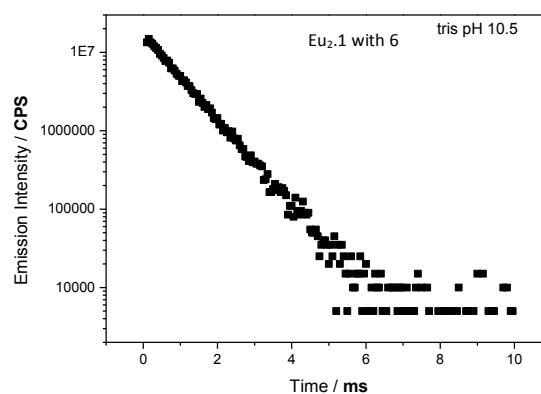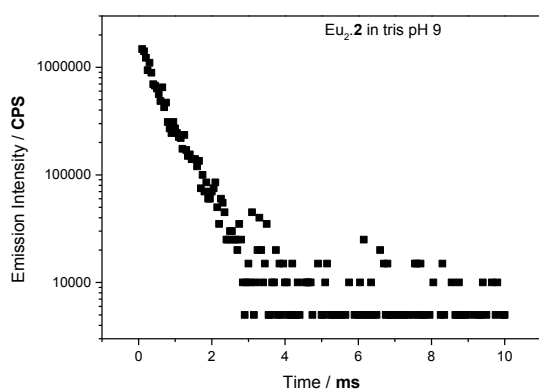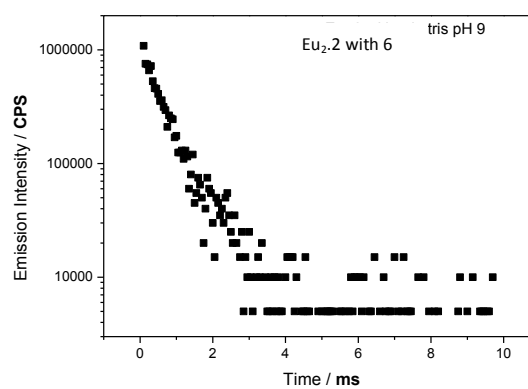

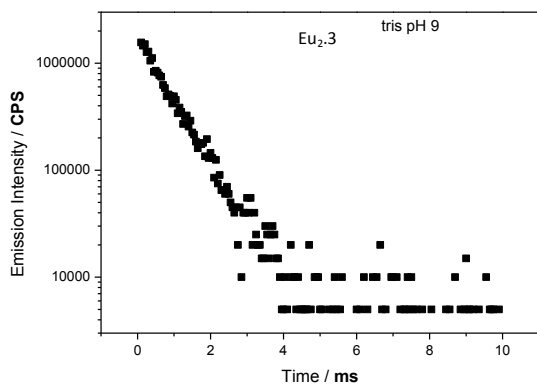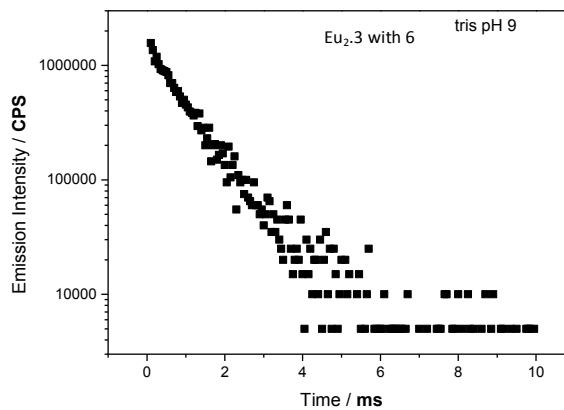

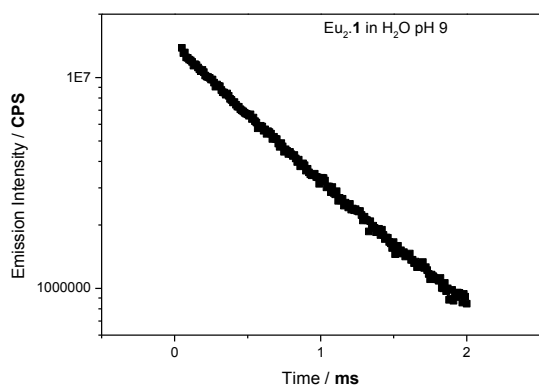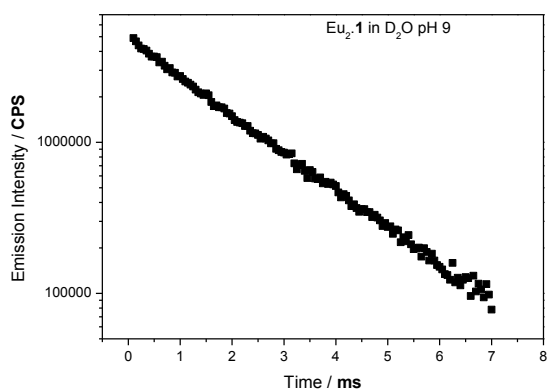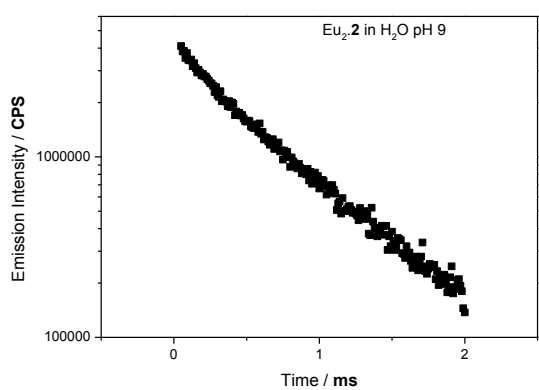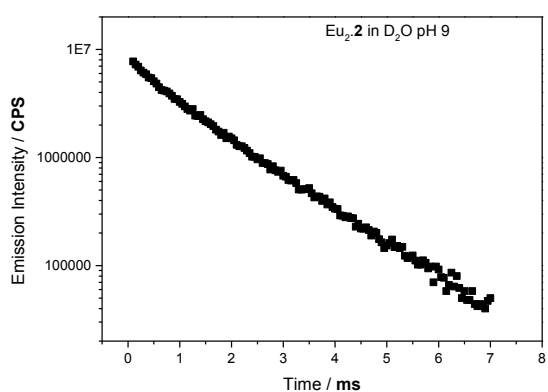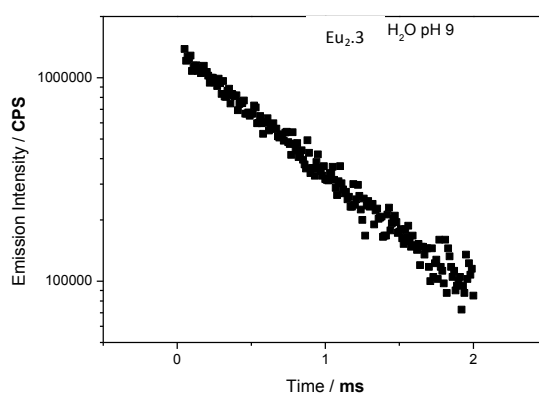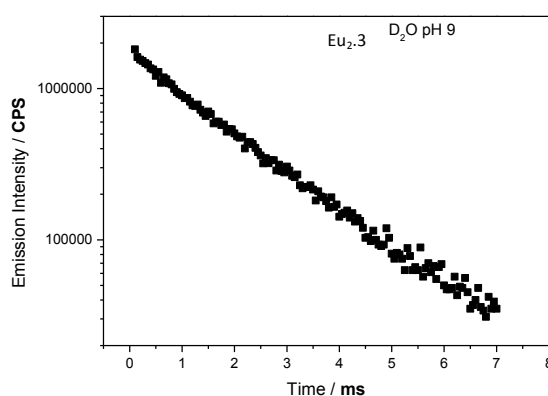

## Dynafit script example

```
[task]
task = fit
data = equilibria
5
[mechanism]
Eu + ISO <=> complex1 : K1 assoc

[constants]
10 K1 = 3e5 ??

[concentrations]
Eu = 2.2E-05 ?

15 [responses]
Eu = 26000 , complex1 = 0

[equilibria]
variable ISO
20 file C:\Users\TJS\Desktop\Leila\partII\iso263\f1.txt | response Eu = 0.302e10 ? , complex1 = 10e8 ?
file C:\Users\TJS\Desktop\Leila\partII\iso263\f2.txt | response Eu = 0.302e10 ? , complex1 = 10e8 ?
file C:\Users\TJS\Desktop\Leila\partII\iso263\f3.txt | response Eu = 0.302e10 ? , complex1 = 10e8 ?
file C:\Users\TJS\Desktop\Leila\partII\iso263\f4.txt | response Eu = 0.302e10 ? , complex1 = 10e8 ?
file C:\Users\TJS\Desktop\Leila\partII\iso263\f5.txt | response Eu = 0.302e10 ? , complex1 = 10e8 ?
25 ;file C:\Users\TJS\Desktop\Leila\partII\iso263\f6.txt | response Eu = 0.302e10 ? , complex1 = 10e8 ?
;file C:\Users\TJS\Desktop\Leila\partII\iso263\f7.txt | response Eu = 0.302e10 ? , complex1 = 10e8 ?
;file C:\Users\TJS\Desktop\Leila\partII\iso263\f8.txt | response Eu = 0.302e10 ? , complex1 = 10e8 ?
;file C:\Users\TJS\Desktop\Leila\partII\iso263\f9.txt | response Eu = 0.302e10 ? , complex1 = 10e8 ?

30 [output]

directory C:\Users\TJS\Desktop\Leila\partII\iso263\results

35
```
